# Supplementary material for: A methodology to infer gene networks from spatial patterns of expression – an application to fluorescence in situ hybridization images
Source: Royal Society of Chemistry journal article supplement (doi:10.1039/c3mb25475e), 2013-03-22
Supplement: c3mb25475e.pdf [file c3mb25475e.pdf]

## A methodology to infer gene networks from spatial patterns of expression - An application to fluorescence *in situ* hybridization images

### Supplementary Material

The distributions of correlation coefficients for the stages 2 to 5 and the corresponding distribution of the random ensembles.

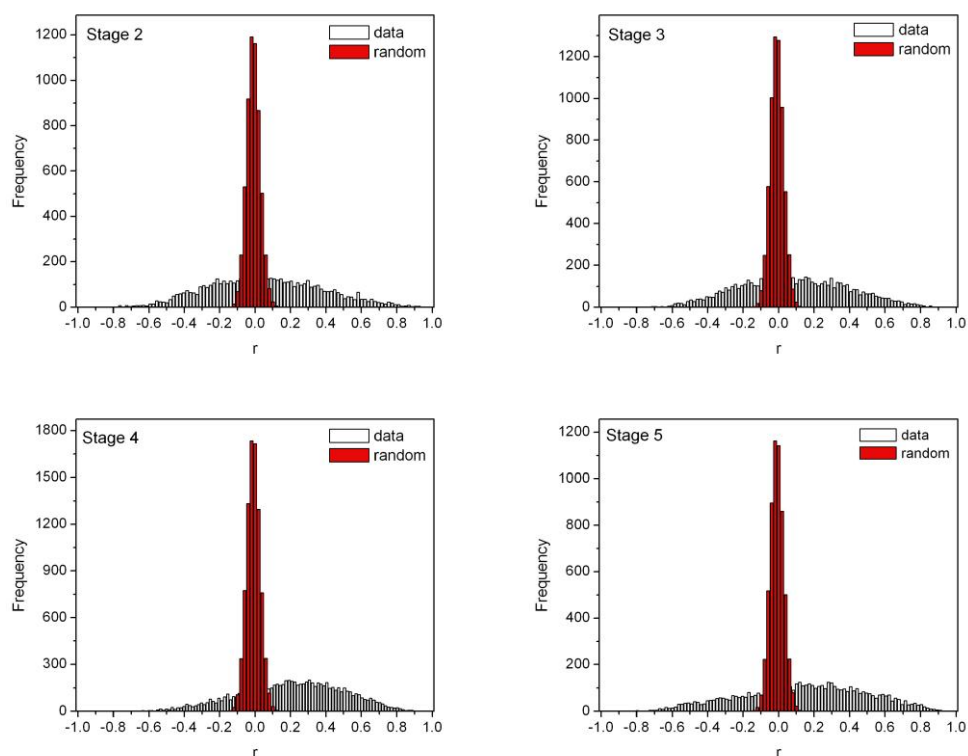

The cut-off value was defined as  $r_0 = 0.75$  that corresponds to a p-value  $< 10^{-5}$  for a gaussian fitted to the random ensemble distribution curve.
